# Supplementary material for: Salmonella Enteritidis Effector AvrA Suppresses Autophagy by Reducing Beclin-1 Protein
Source: PubMed Central journal article supplement (PMC7181453; doi:10.3389/fimmu.2020.00686), 2020-04-17

Fig. S1

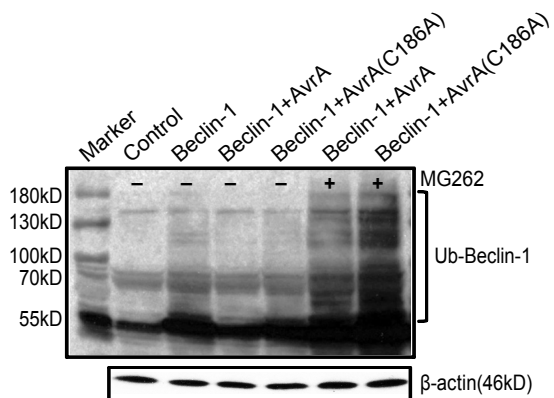

Supplement: Image_1.pdf [file Image_1.pdf]
